# Supplementary material
Source: HighWire-hosted journal article supplement (http://www.qdcxjkg.com/highwire/filestream/113860/field_highwire_adjunct_files/0/ERJ-01154-2012_Disclosures.pdf)
Supplement: ERJ-01154-2012_Disclosures.pdf [file ERJ-01154-2012_Disclosures.pdf]

**P.J. Sterk.** The author's institute has received a public-private grant by the Innovative Medicines Initiative (IMI) from the European Union as coordinating centre of the U-BIOPRED study.
